# Supplementary material
Source: PubMed Central journal article supplement (PMC3751422)
Supplement: NIHMS492327-supplement-01.pdf [file NIHMS492327-supplement-01.pdf]

## Notch NRR sequence alignments

|                            |       |                                                              |                       |
|----------------------------|-------|--------------------------------------------------------------|-----------------------|
|                            |       | LNR-A                                                        | LNR-B...              |
| human N1                   | /1447 | EEACELPECOEDAGNKVCSLQCNNHACGWDGGDCSLNFNDFWKNC                | TQSLQCWKYFSDGHC       |
| human N2                   | /1422 | PATCLSQYCADKARDGVCEACNSHACQWDGGDCSLTMENFWANCSSFLPCWDYINN     | .QC                   |
| human N3                   | /1384 | EPRCPRAACQAKRGDQRCRECNSPGCGWDGGDCSLVGD PWRQCEA               | .LQCWRLFNNSRC         |
| human N4                   | /1171 | .QKPGAKGCEGRSGDGACDAGCSGPGGNWDGGDCSLGVPDPWKGCPSHSRCWLLFRDGC  | QC                    |
| mouse N3                   | /1385 | EPRCPRAACQAKRGDQNCRECNTPGCGWDGGDCSLNVDD PWRQCEA              | .LQCWRLFNNSRC         |
| rat N3                     | /1386 | EPRCPRAACQAKRGDQNCRECNTPGCGWDGGDCSLNVDD PWRQCEA              | .LQCWRLFNNSRC         |
| zebrafish N3               | /1389 | BSPCPIADCFKANDGVCDKECNSLDCRWDGGDCSLAVN                       | .PWARCAD.PRCWRLFNNSRC |
| LNR-C                      |       |                                                              |                       |
| human N1                   | /1507 | DSQCNSAGCLFDGFDQR..AEGQCNP LYDQYCKDHFSDGHCDQGCNSAECEWDGLDCAE |                       |
| human N2                   | /1481 | DELCNTVECLFDNFECQG..NSKTKK..YDKYCADHFKDNHCDQGCNSEECGWDGLDCAA |                       |
| human N3                   | /1443 | DPACSSPACLYDNFDCHAGGRERTCNFVYEKYPADHFADGRCDQGCNTEECGWDGLDCAS |                       |
| human N4                   | /1230 | HPQCDSEECFLFDGYDCET..PPACTPAYDQYCHDFHNGHCEKGCNTAECGWDGGDCRP  |                       |
| mouse N3                   | /1444 | DPACSSPACLYDNFDQYSGGRDRTCNFVYEKYPADHFADGRCDQGCNTEECGWDGLDCAS |                       |
| rat N3                     | /1445 | DPACSSPACLYDNFDQYSGGRDRTCNFVYKYPADHFADGRCDQGCNTEECGWDGLDCAS  |                       |
| zebrafish N3               | /1447 | DEFCNNAECLFDNFDCIN..KEKVCNPIYEAYCTDHYADGLCDQGCNTEECGWDGLDCAR |                       |
| β1      α1      β2      β3 |       |                                                              |                       |
| human N1                   | /1565 | HVPERLAAGTLVVVLMPPPEQLRNSSFHFLRELSRVLHTNVVFKRDAHQQMIFPYYGRE  |                       |
| human N2                   | /1537 | DQPENLAEGTLVIVVLMPPPEQLLQDARSFLRALGTLHTNLRIRKRSQGELMVYPYYGEK |                       |
| human N3                   | /1503 | EVPALLARGVVLTVLLPPEELLRSSADFLQRLSAILRTSLRFRDLAHGQAMVFPYHRPS  |                       |
| human N4                   | /1287 | EDGDPWGPSSLALLVVLSPALDQQLFALARVLSLTLRVGLWVRKDRDRDGMVYPYPGAR  |                       |
| mouse N3                   | /1504 | EVPALLARGVVLTVLLPPEELLRSSADFLQRLSAILRTSLRFRDLARGQAMVFPYHRPS  |                       |
| rat N3                     | /1505 | EVPALLARGVVLTVLLPPEELLRSSADFLQRLSAILRTSLRFRDLARGQAMVFPYHRPS  |                       |
| zebrafish N3               | /1505 | KIPEDLAEDMLVIVVLLPPEELLRTQTAFLQKLSAILRTTLRFRDLRNGDYMIRPYT... |                       |
| S1                         |       |                                                              |                       |
| human N1                   | /1625 | EELRKHPKRAEAGWAAPDALLGQVKASLLPGGSEGGRRRRELDP...MDVRGSIVYLE   | β4...                 |
| human N2                   | /1597 | SAAMK.....QRMTRRSL.PGEQEQEVAGSKVFLE                          |                       |
| human N3                   | /1563 | PGSEPR.....ARRELAP.....EVIGSVVMLE                            |                       |
| human N4                   | /1347 | AEEKLG.....GTRDPTYQERAAPQTQPLGKETD...SLSAGFVVVMG             |                       |
| mouse N3                   | /1564 | PGSESR.....VRRELGP.....EVIGSVVMLE                            |                       |
| rat N3                     | /1565 | PGSESR.....VRRELGP.....EVIGSVVMLE                            |                       |
| zebrafish N3               | /1562 | .GRETR.....IKRELNP.....QEVIGSIVYLE                           |                       |
| S2                         |       |                                                              |                       |
| human N1                   | /1681 | IDNRQCVQA..SSQCFQSAIDVAAFLGALASLGSIN..IPYKIEAVQSETVEPPPPAQ   |                       |
| human N2                   | /1627 | IDNRQCVQD..SDHCFKNTDAAAALLASHAIQGTLS..YPL..VSVSESLTPERTQ.    |                       |
| Human N3                   | /1586 | IDNRLCLQSPENDHCFPDQAQAADYLGA LSAVERLD..FPYPLRDVRGEPLPEPEPS.  |                       |
| human N4                   | /1387 | VDLSRCGPDHPASRCPWDPLLLRFLAAMA AVGALEPLLPGPLLAVHPHAGTAPPANQ   |                       |
| mouse N3                   | /1587 | IDNRLCLQSAENDHCFPDQAQAADYLGA LSAVERLD..FPYPLRDVRGEPLPEPEQS.  |                       |
| rat N3                     | /1588 | IDNRLCLKSAENDHCFPDQAQAADYLGA LSAVERLD..FPYPLRDVRGEPLPEPEQS.  |                       |
| zebrafish N3               | /1585 | IDNRLCSQG..SDDCFRNADSAEAYLGA LSAVERLD..FPYPIKEVTSEKREPSITE.  |                       |

Figure S1

Peptide coverage map of Notch3 NRR (Common peptides found from three different sets of experiments).

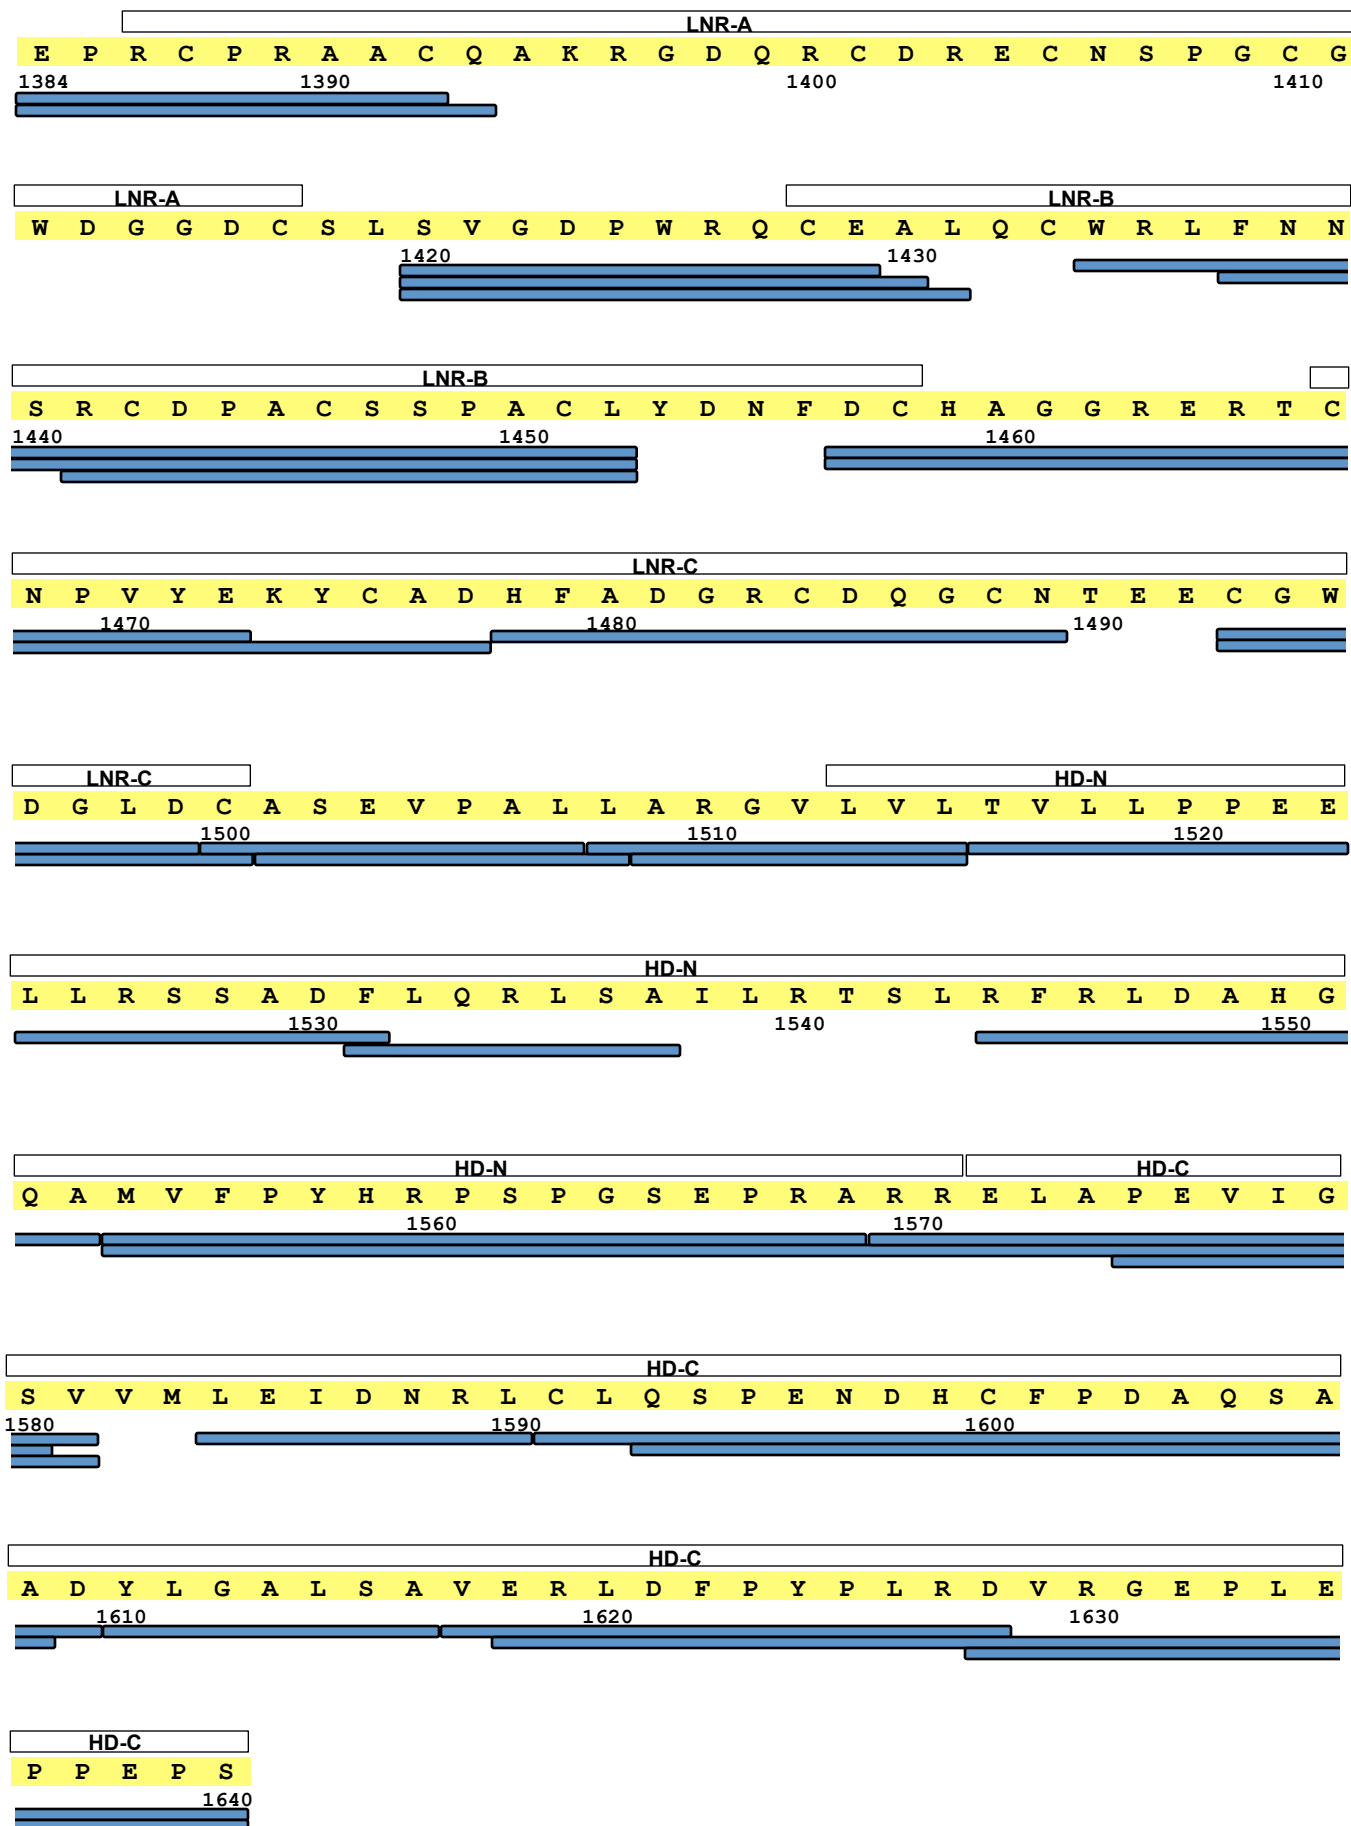

Figure S2

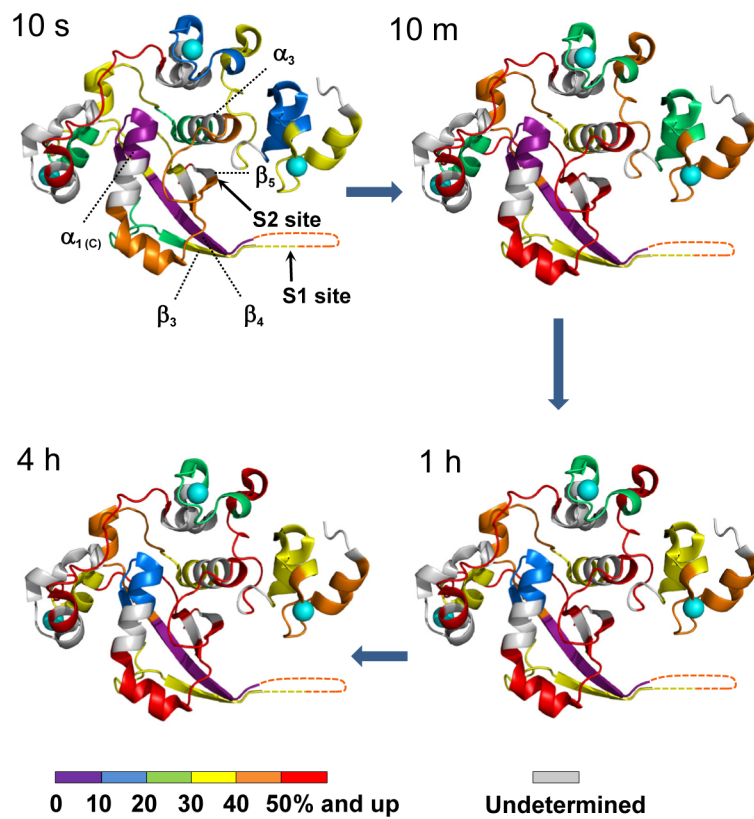

Figure S3

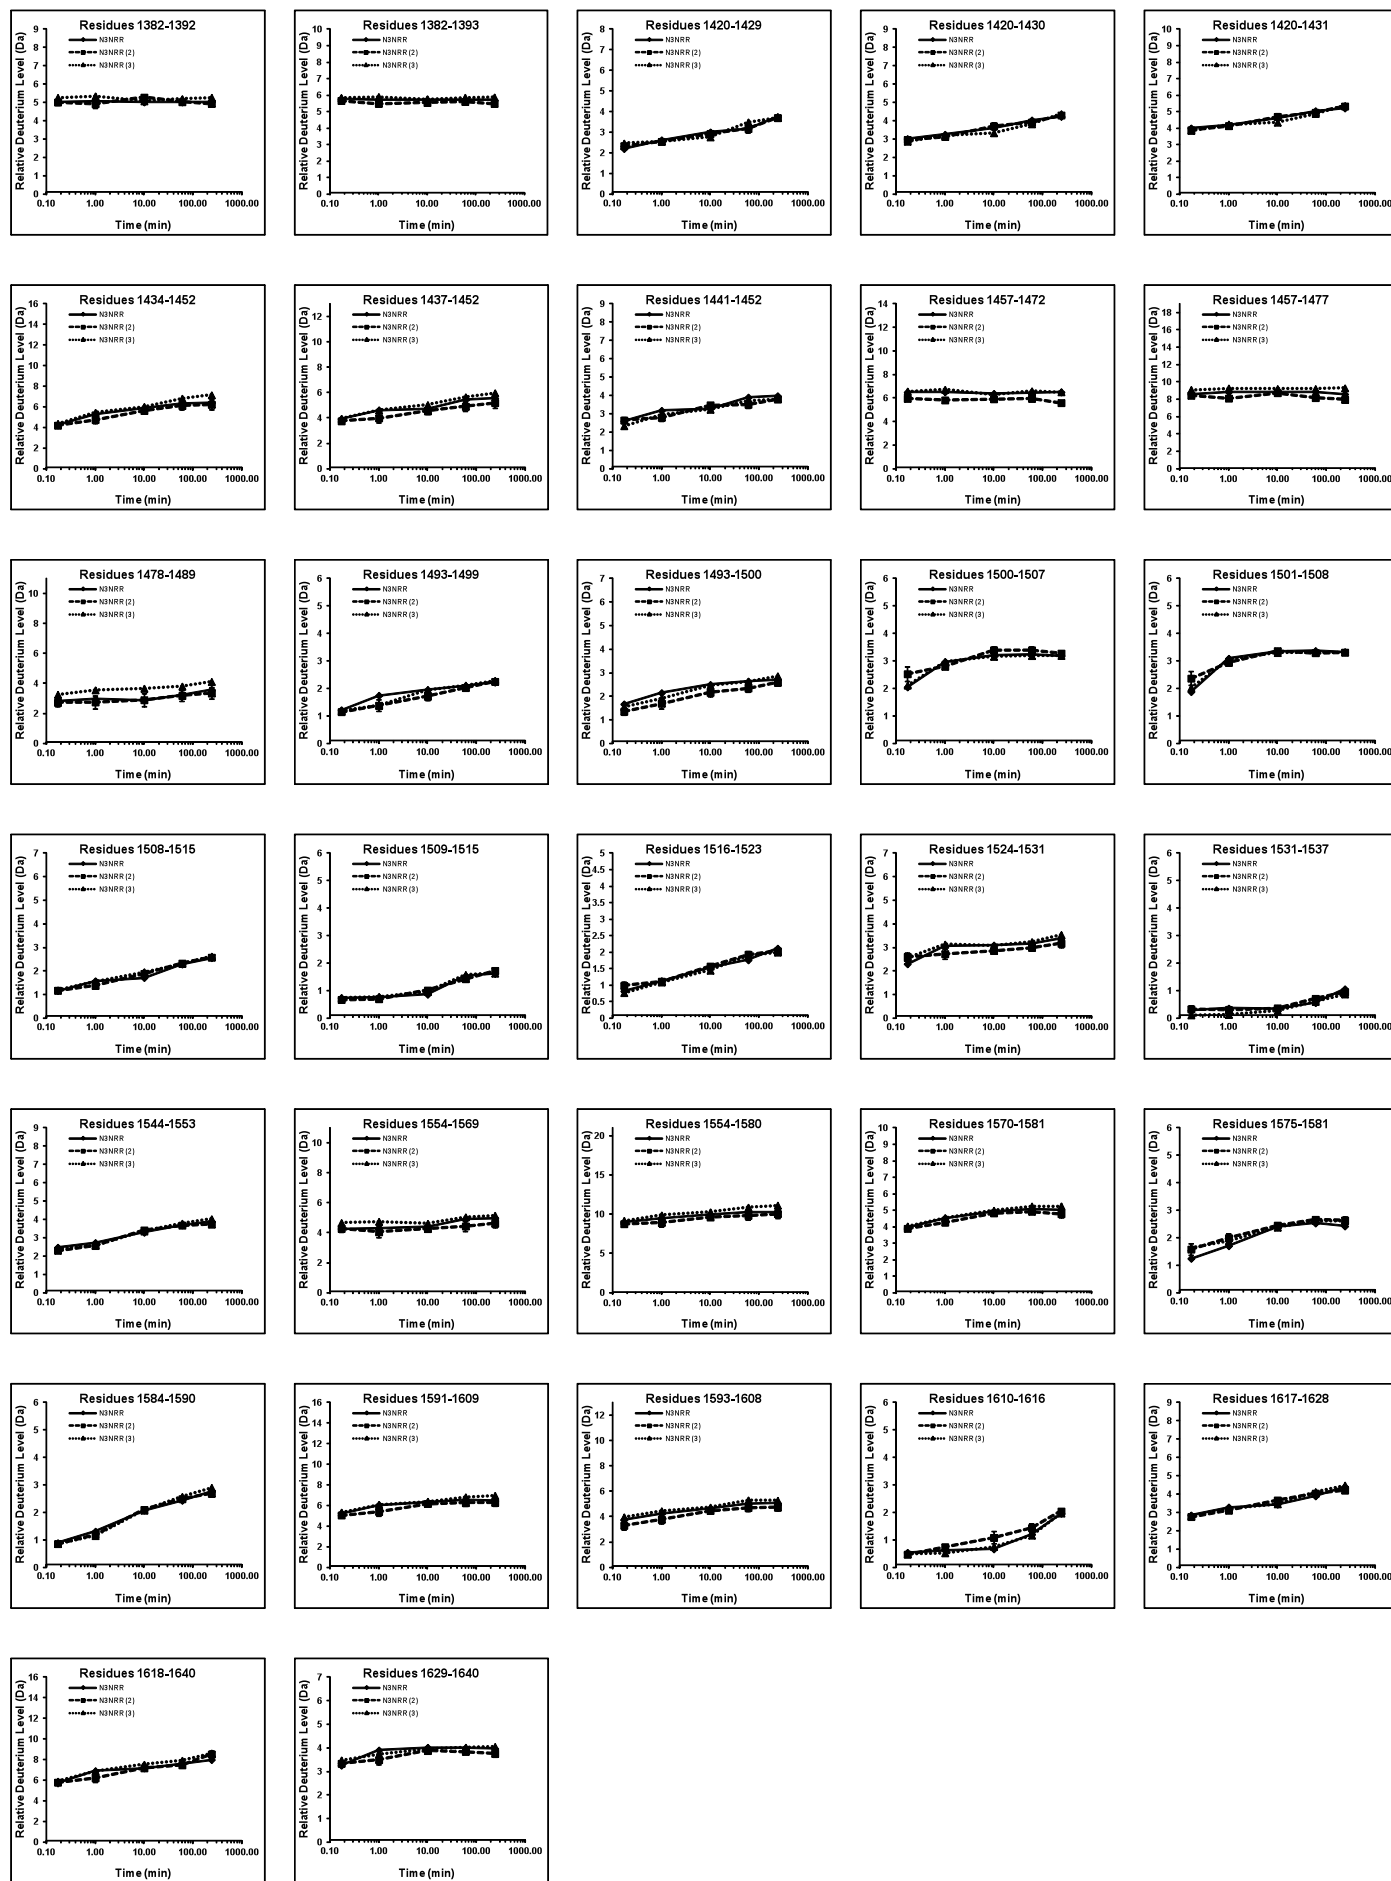



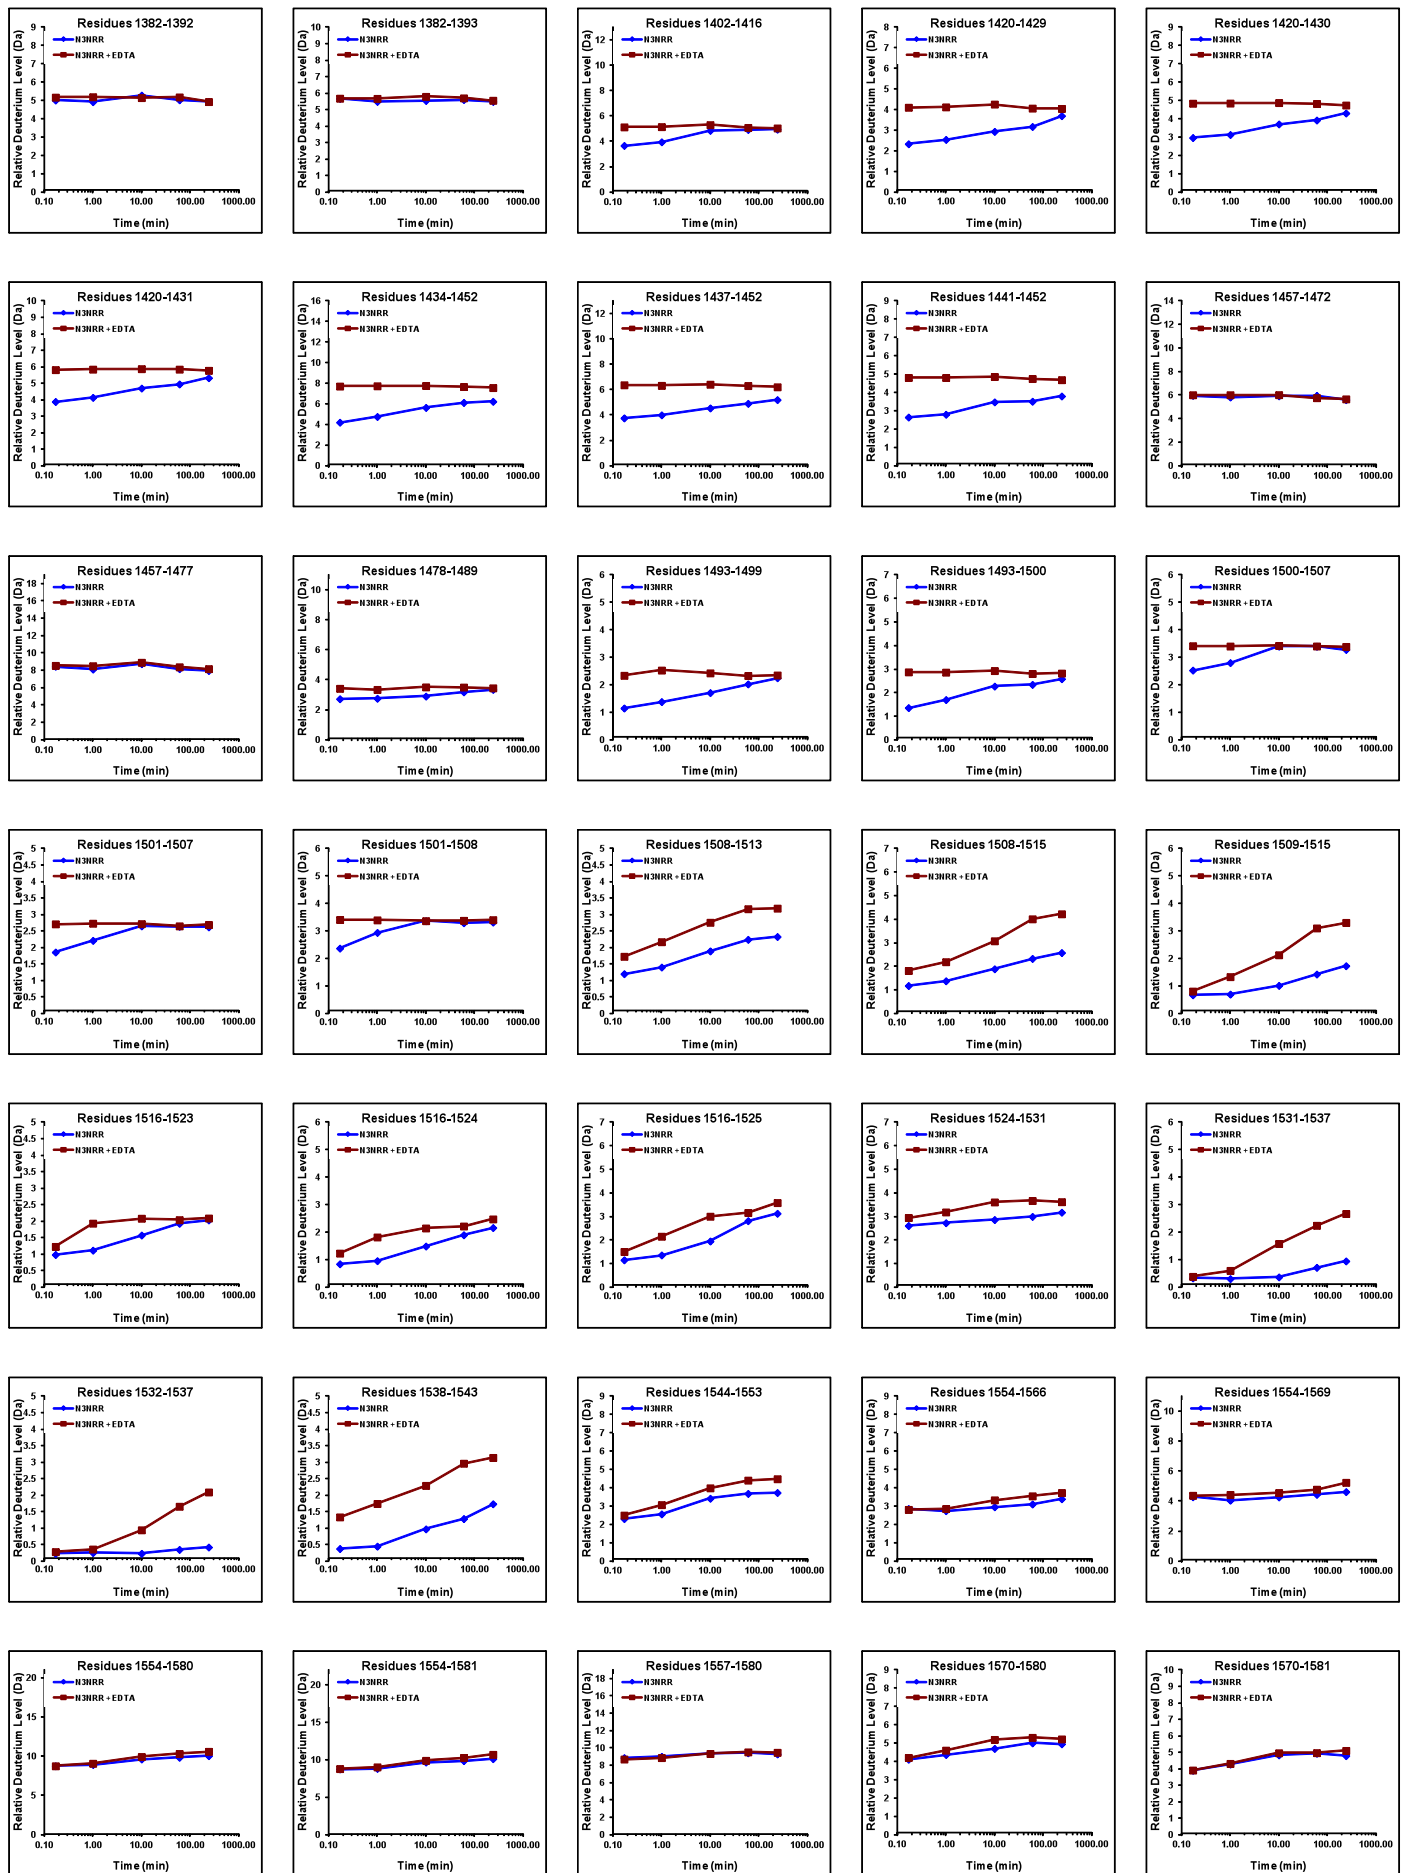

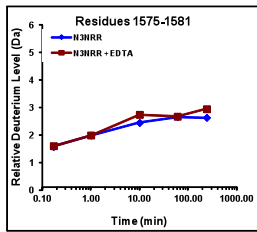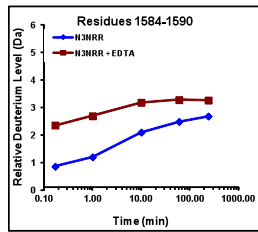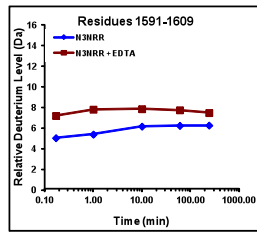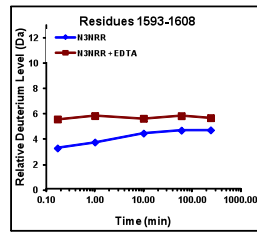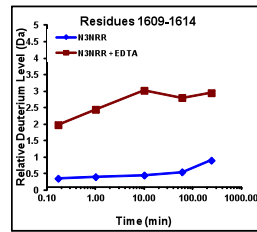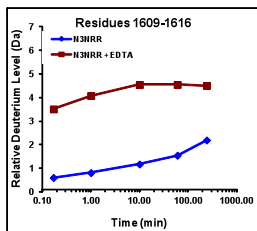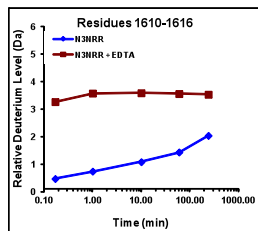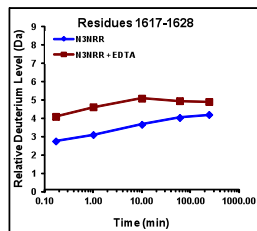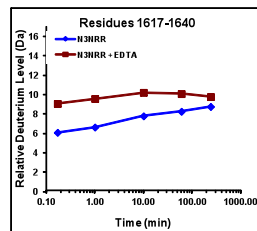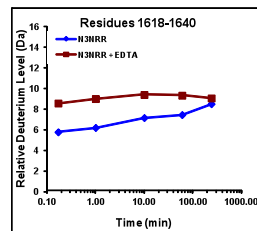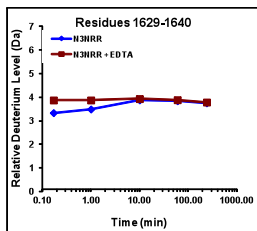

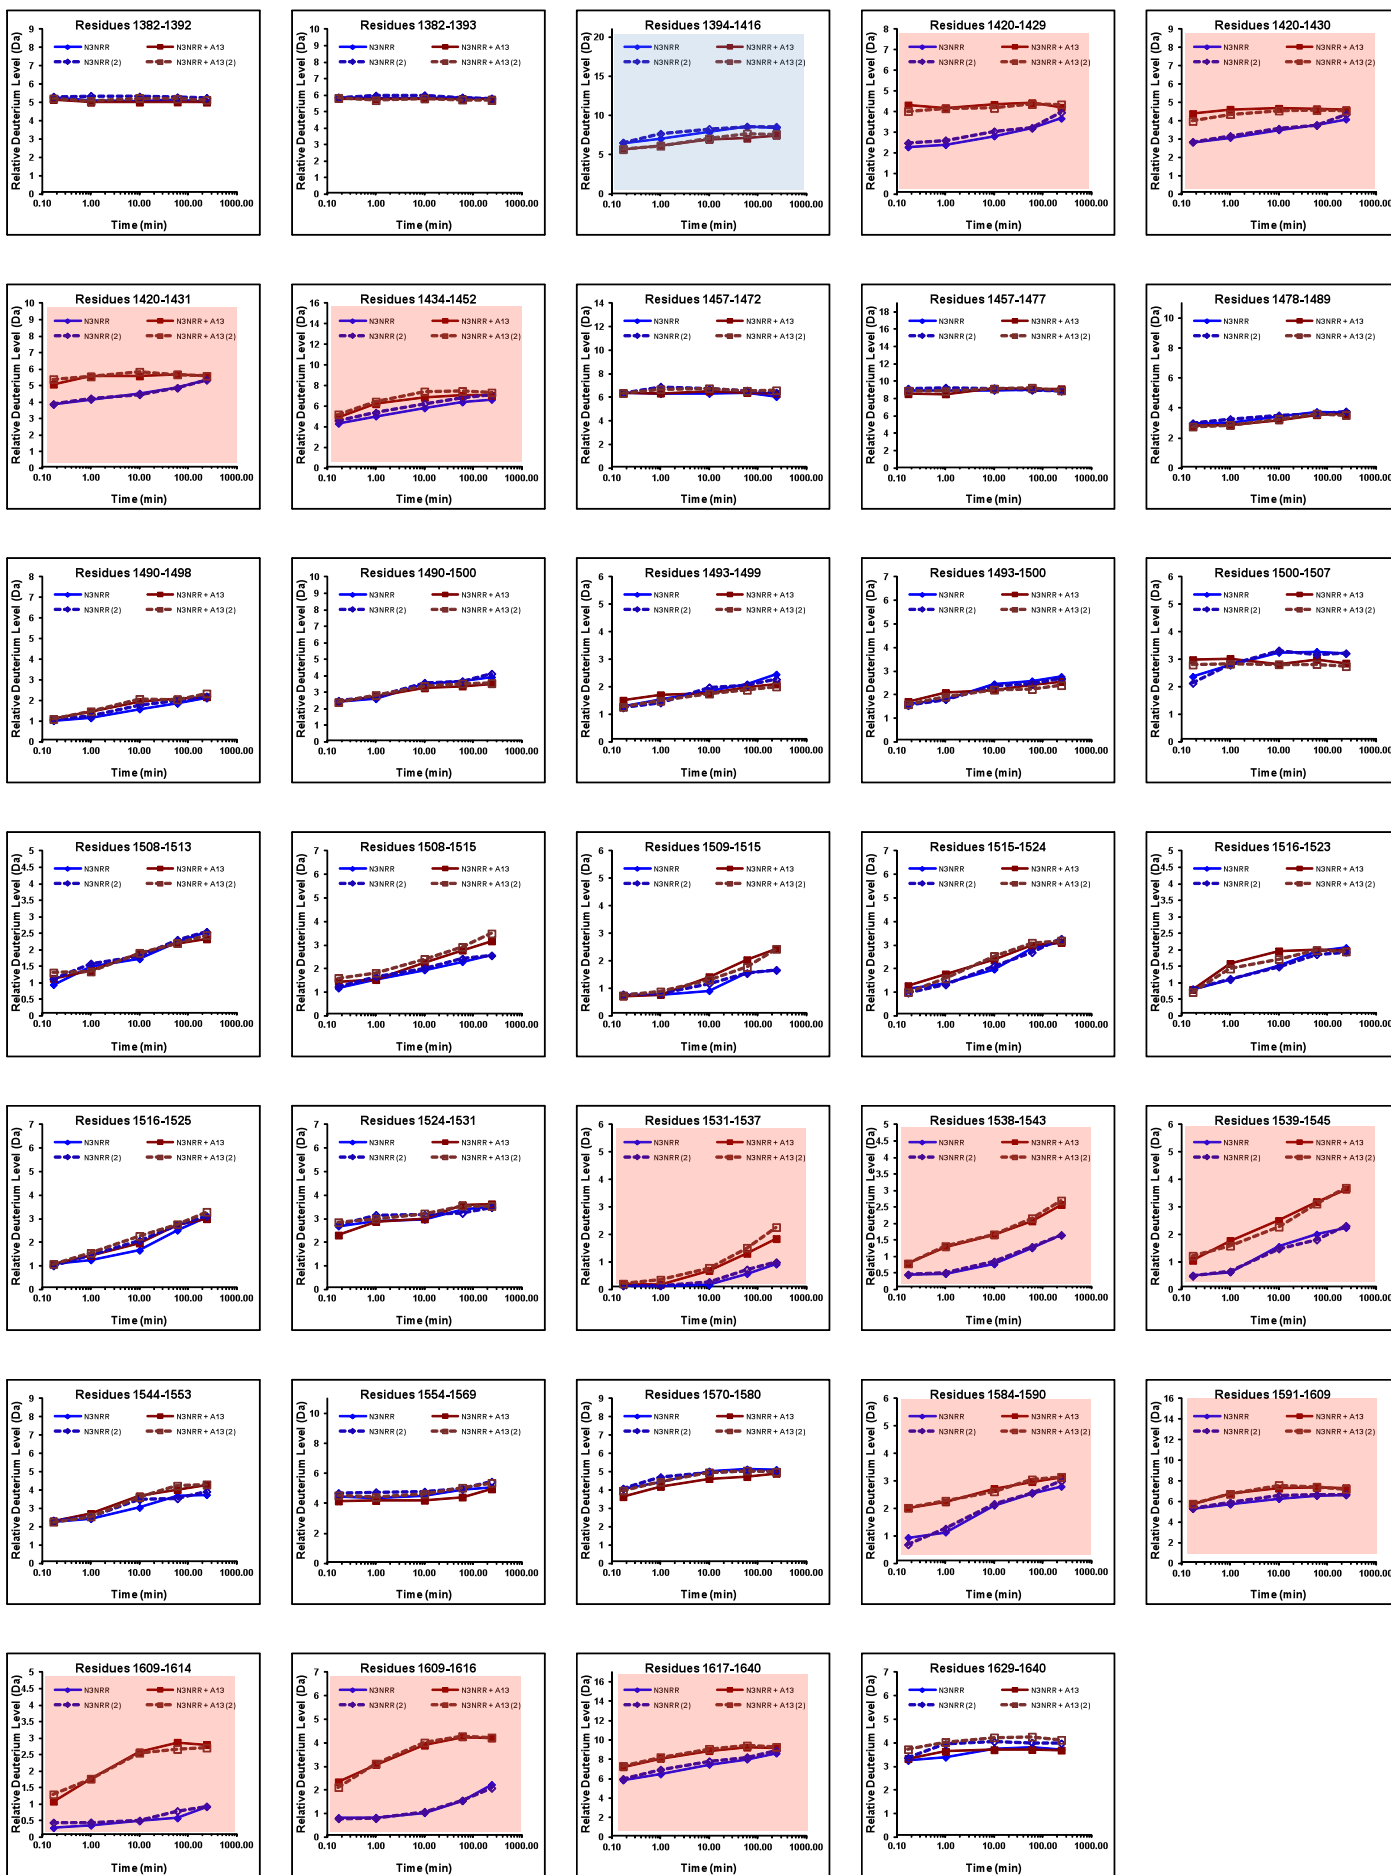

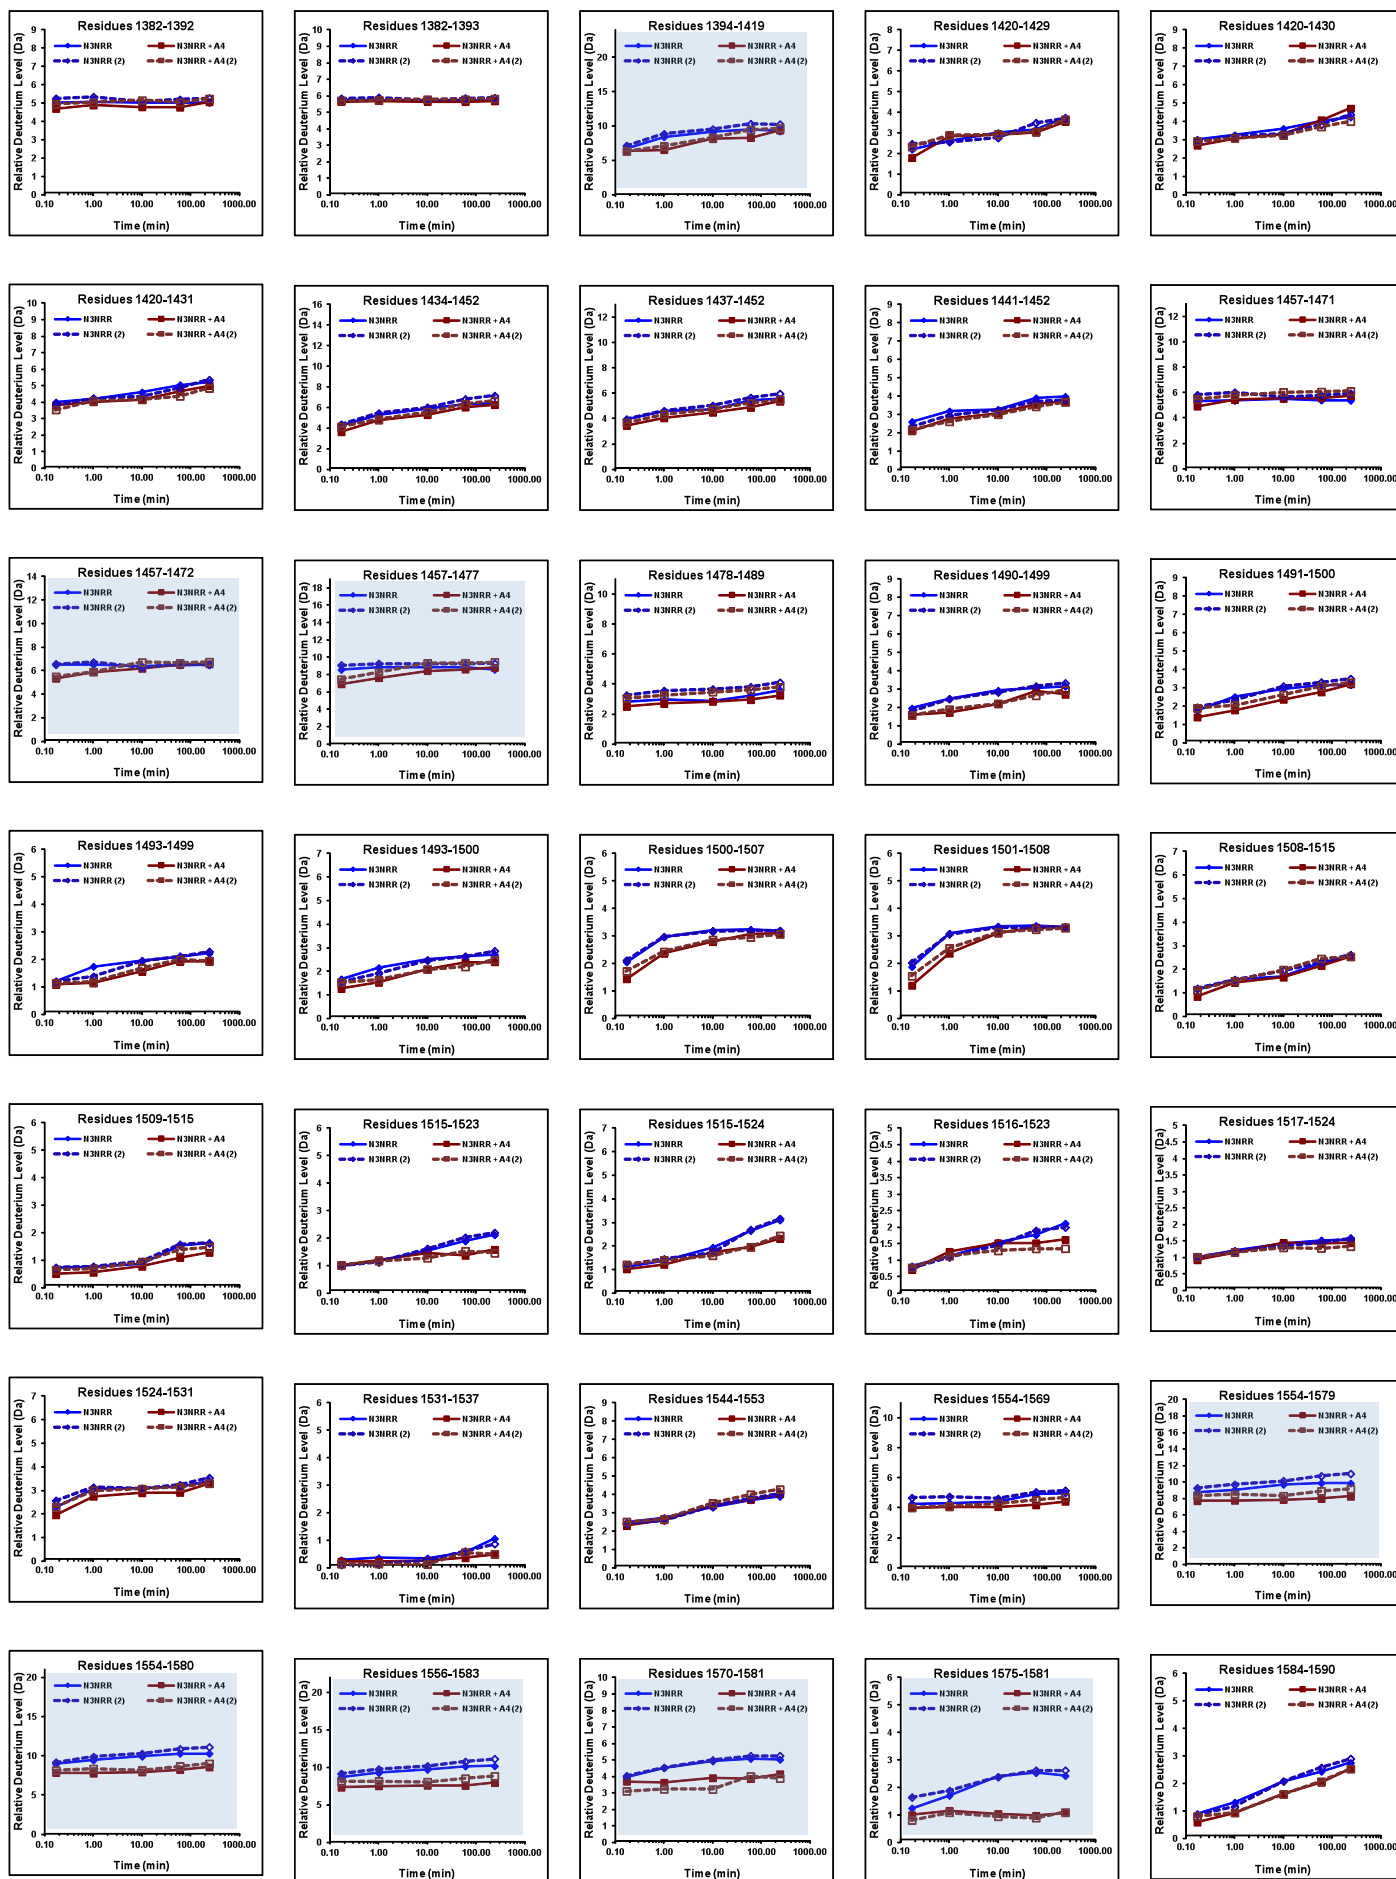

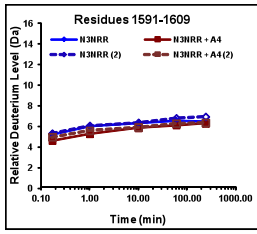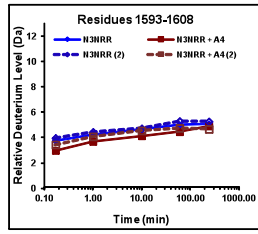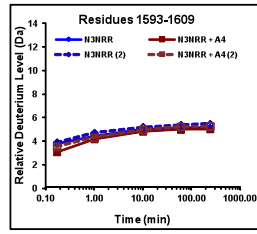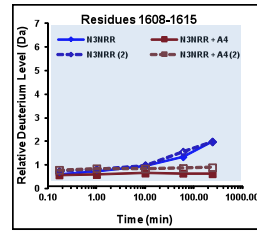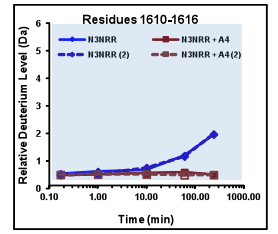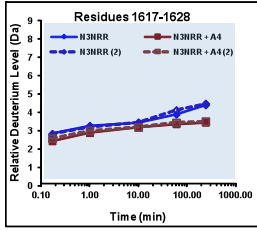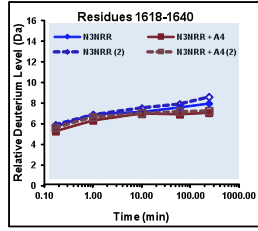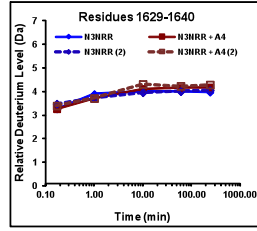

# N3NRR vs N3NRR + A4 Fab (Inhibitory Antibody)

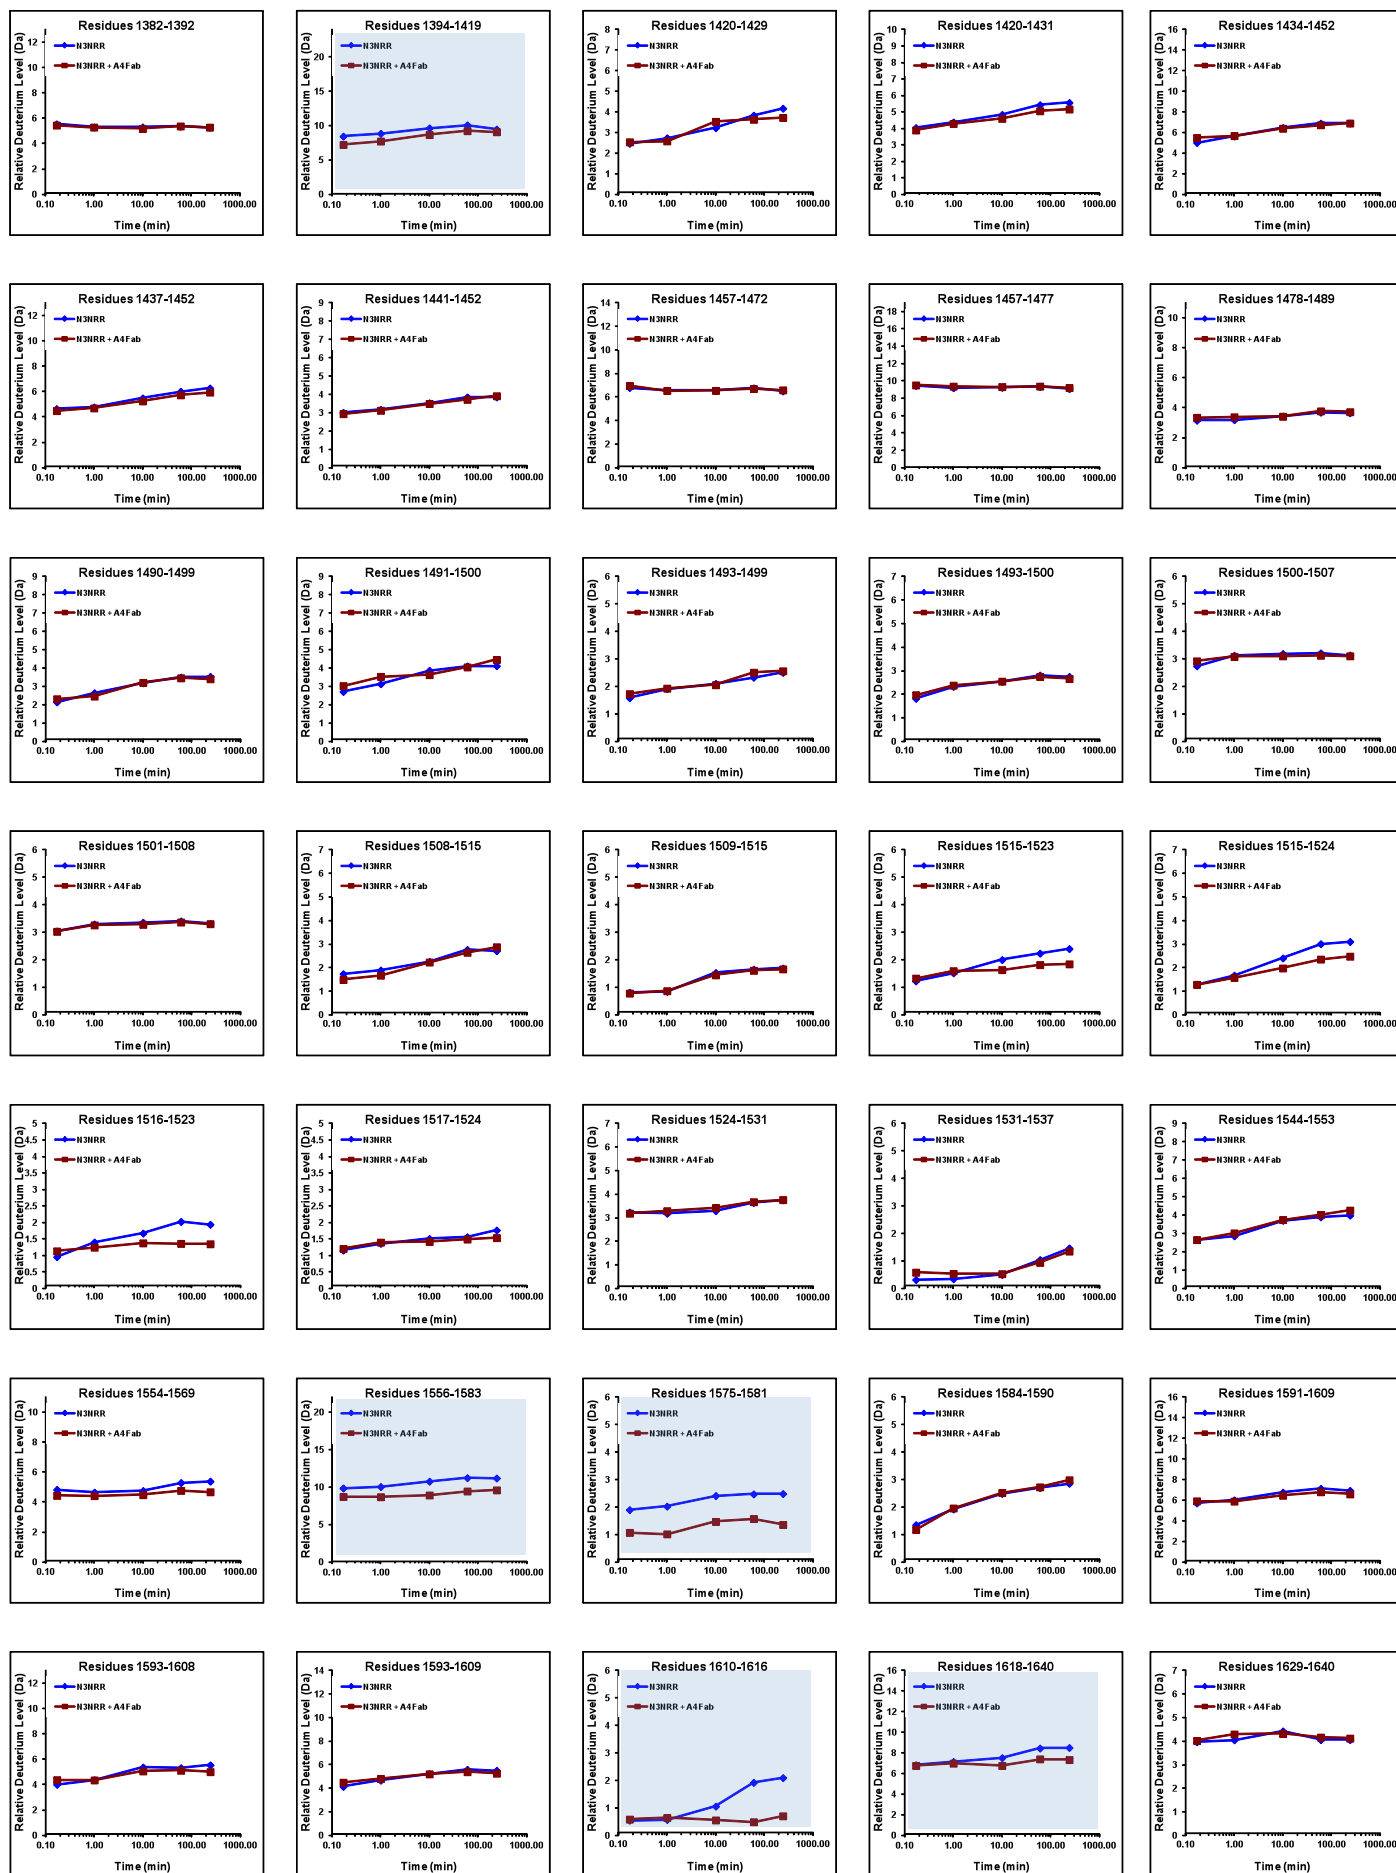

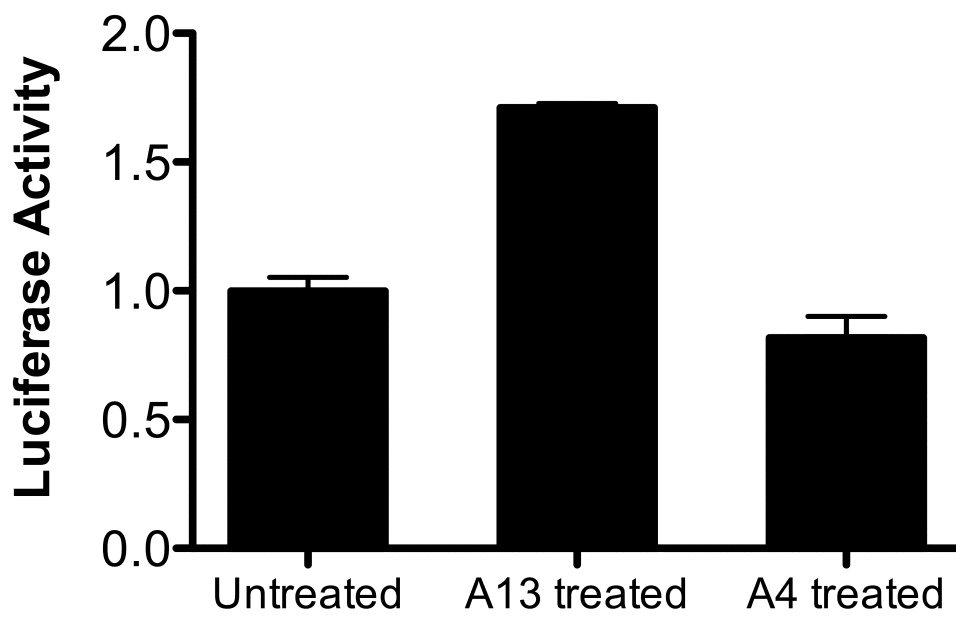

Figure S5

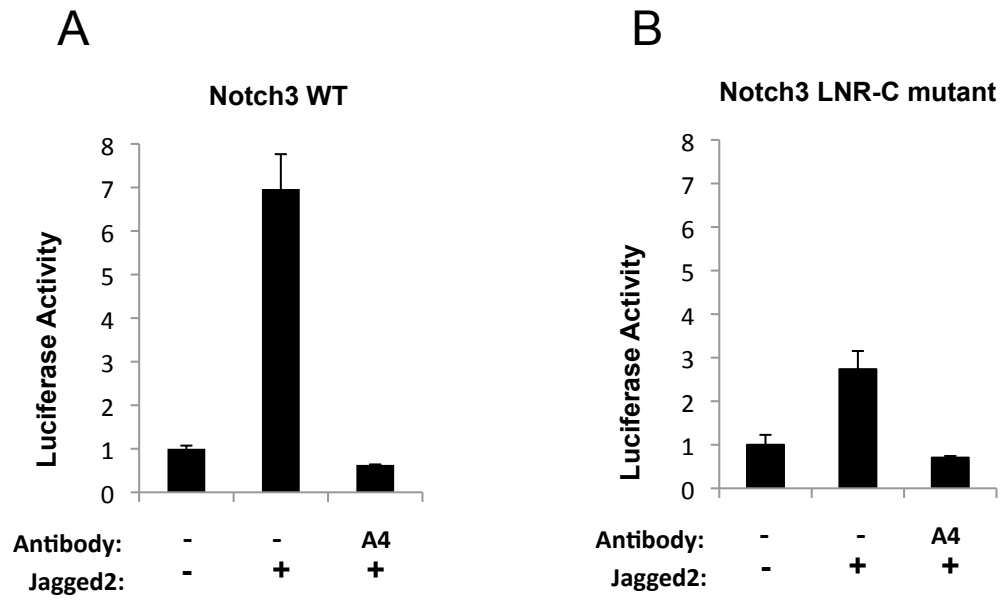

Figure S6
